# Supplementary material
Source: Research Square preprint supplement (doi:10.21203/rs.3.rs-9010492/v1)
Supplement: Supplementary file 1 [file 2aa23e325d6d070710df0cda.docx]

**Supplemental Motivation Control and Path Integration Analysis**

**Methods**

*One-hour unfamiliar view exposure experiment*

In the unfamiliar condition, ants were tethered upon the trackball at a distant, unfamiliar site (Unfamiliar Site A 70m from the established route; Supplemental Figure 1) with their paths collected for 60min. After 60min, a cover was placed over tethered ants were covered for 5min while the trackball was transported to a distinct unfamiliar site (Unfamiliar Site B, 51 meters from the established route) where the ant was uncovered, and their path collected for 5min. Ants were then re-covered for 5min while the trackball was transported to the familiar location at the centre of their foraging route. The cover was removed, and the test began with individuals’ paths collected for 5min.

Data processing and statistical analyses

Path integration vector estimation

The state of the path integrator (PI) was estimated by summing successive displacement vectors over time to generate a home vector representing the ant’s inferred distance and direction to the nest. Vector length was normalised by total path length where appropriate. PI direction was expressed relative to the nest-aligned visual direction, such that a negative PI vector accumulated during trackball walking pointed approximately 180° from the nest direction.

To test whether PI state influenced orientation, we examined changes in PI vector length and direction across time windows and assessed whether ants oriented preferentially toward their PI vector using circular statistics.

**Results**

*Path integrator state cannot explain the increase in angular error*

We examined whether the deterioration in route-following behaviour could be explained by the accumulation of a conflicting path-integration vector. As ants walk toward the nest on the trackball at the familiar site, they accumulate a negative vector pointing backwards (180° to the nest-aligned view), which could, in principle, introduce conflict between visual and path-integrator cues. If the observed disorientation were due to the PI, ants should orient and “run off” this vector during the five minutes spent at the unfamiliar site. However, vector lengths remained stable at Site A, and foragers were never significantly oriented toward their PI vector during either the 1-h extinction period or the post-view-change test (Supplemental Figure 3). These results indicate that the increased angular error reflects modulations to visual memory rather than the interaction between views and the path integrator state.

*Unfamiliar view exposure does not reduce motivation to use visual memories*

As a control, we evaluated whether prolonged tethering alone reduces ants’ motivation to rely on visual route memories. Ants were tested for one hour at an unfamiliar site (Site A, SFig. 1), transferred to a second unfamiliar site (Site B, SFig. 1) for 5min and then transferred to the midpoint of their familiar route. During the one-hour period at the unfamiliar site, angular error did not differ from random expectations (90° threshold; Wilcoxon, p>0.05), and orientation was uniformly distributed across all time windows (Rayleigh tests, p>0.05). This confirms that Site A was genuinely unfamiliar for these foragers. In contrast, when these ants were returned to the familiar views of the route centre for the 5-min test, angular error sharply decreased, and individuals showed significant nest-ward orientation (V test; p<0.001). These test headings demonstrated that M. midas foragers remain motivated to attend to and use familiar terrestrial cues even after more than one hour on the trackball. Thus, the behavioural changes observed after extinction at the familiar site cannot be attributed to reduced motivation or fatigue but instead reflect genuine, enroute modifications to the visual memory associated with that specific view.
